# Supplementary material for: Efficient Lignin Fractionation from Scots Pine (Pinus sylvestris) Using Ammonium-Based Protic Ionic Liquid: Process Optimization and Characterization of Recovered Lignin
Source: MDPI journal article supplement (doi:10.3390/polym14214637), 2022-10-31
Supplement: s1 [file s1]

# Supplementary Material: Efficient Lignin Fractionation from Scots Pine (*Pinus Sylvestris*) Using Ammonium-based Protic Ionic Liquid: Process Optimization and Characterization of Recovered Lignin

Sharib Khan, Daniel Rauber, Sabarathinam Shanmugam, Christopher W.M. Kay, Alar Konist and Timo Kikas

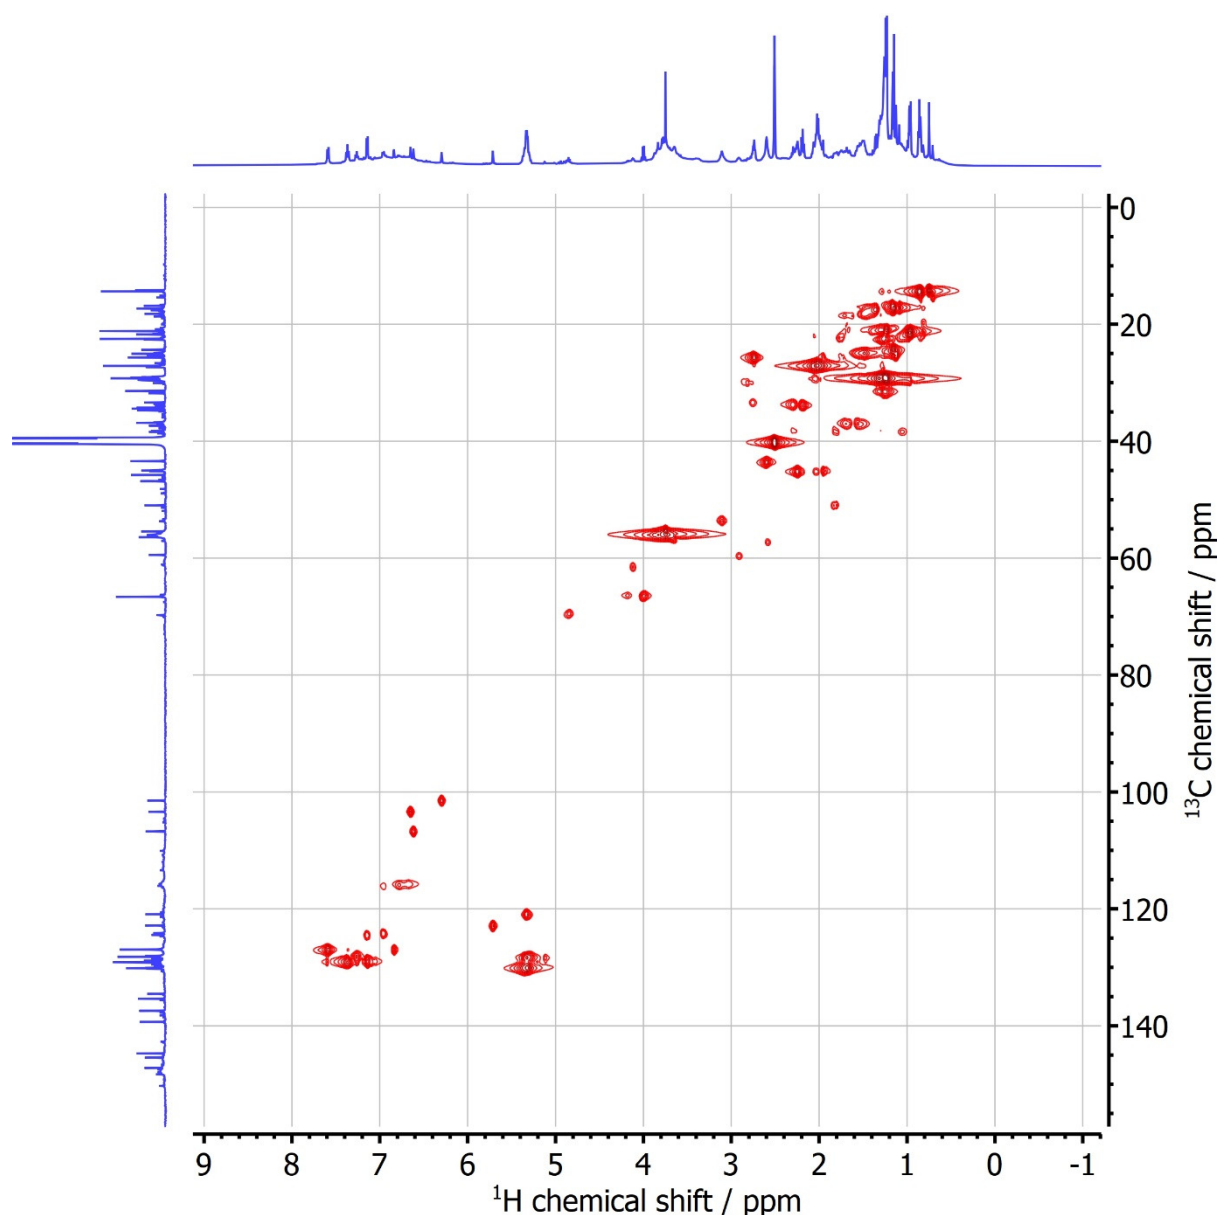

**Figure S1.** HSQC NMR of  $[\text{N11H}(2\text{OH})][\text{LAC}]$  extracted lignin from pine wood biomass.

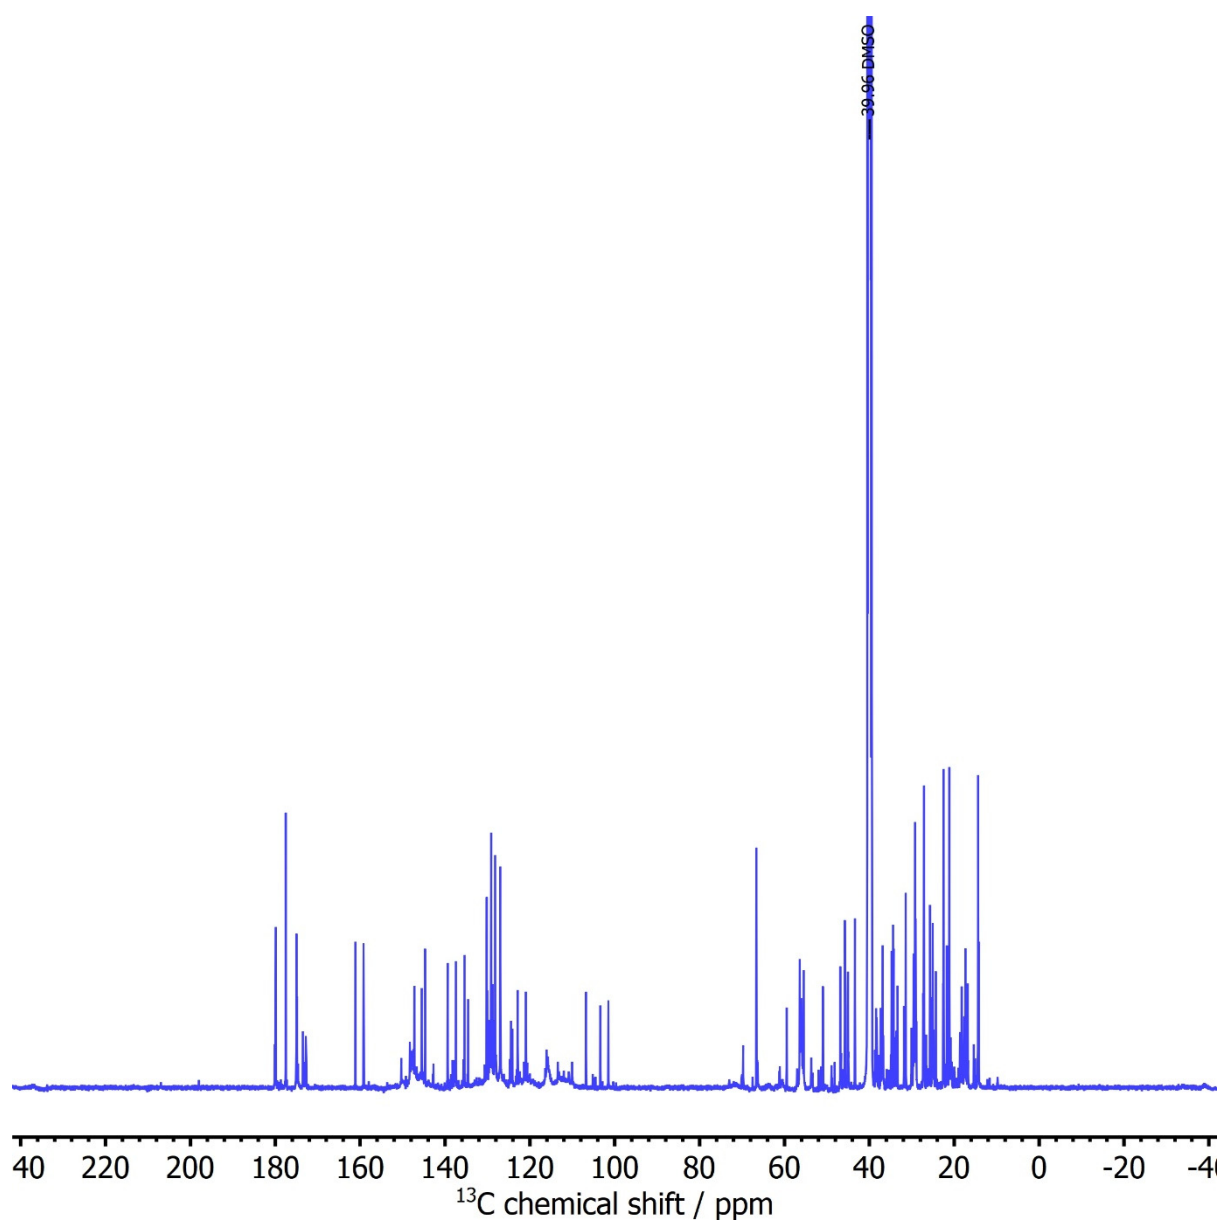

**Figure S2.**  $^{13}\text{C}$  NMR of  $[\text{N11H}(2\text{OH})][\text{LAC}]$  extracted lignin from pine wood biomass.

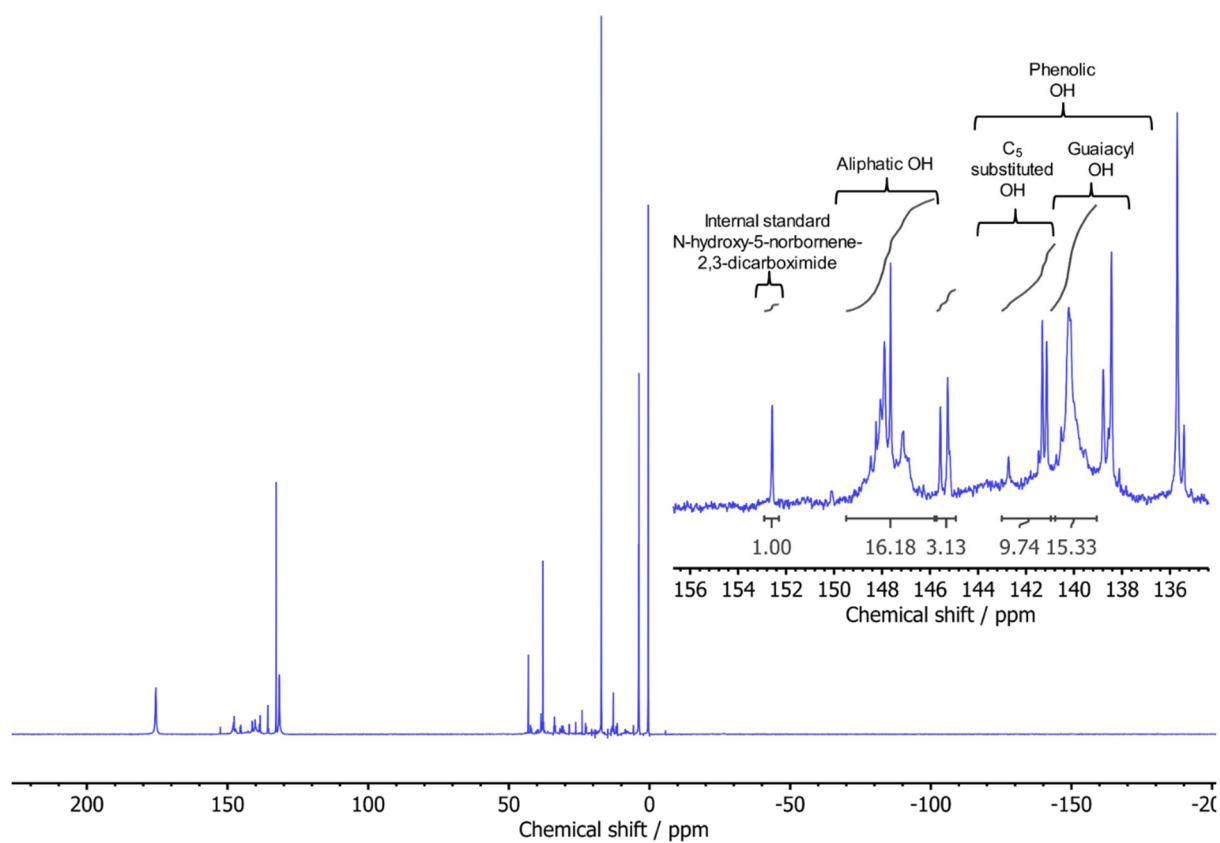

**Figure S3.**  $^{31}\text{P}$  NMR spectrum of the pine wood lignin phosphorylated with 2-chloro-4,4,5,5-tetramethyl-1,3,2-dioxaphospholane (Cl-TMDP) using endo-N-hydroxy-5-norbornene-2,3-dicarboximide as internal standard.
